# Supplementary material for: The 2018–2023 drought in Berlin: impacts and analysis of the perspective of water resources management
Source: Copernicus journal article supplement (doi:10.5194/nhess-2024-187), 2024-10-02
Supplement: Supplementary file 1 [file nhess-2024-187-supplement.pdf]

# The 2018-2023 drought in Berlin: impacts and analysis of the perspective of water resources management

Ina Pohle<sup>1</sup>, Sarah Zeilfelder<sup>1</sup>, Johannes Birner<sup>1</sup>, Benjamin Creutzfeldt<sup>1</sup>

<sup>1</sup>Department of Integrative Environmental Protection (II), Senate Department for Urban Mobility, Transport, Climate Action and the Environment, Berlin, 10179, Germany

Correspondence to: Ina Pohle (Ina.Pohle@senmvku.berlin.de)

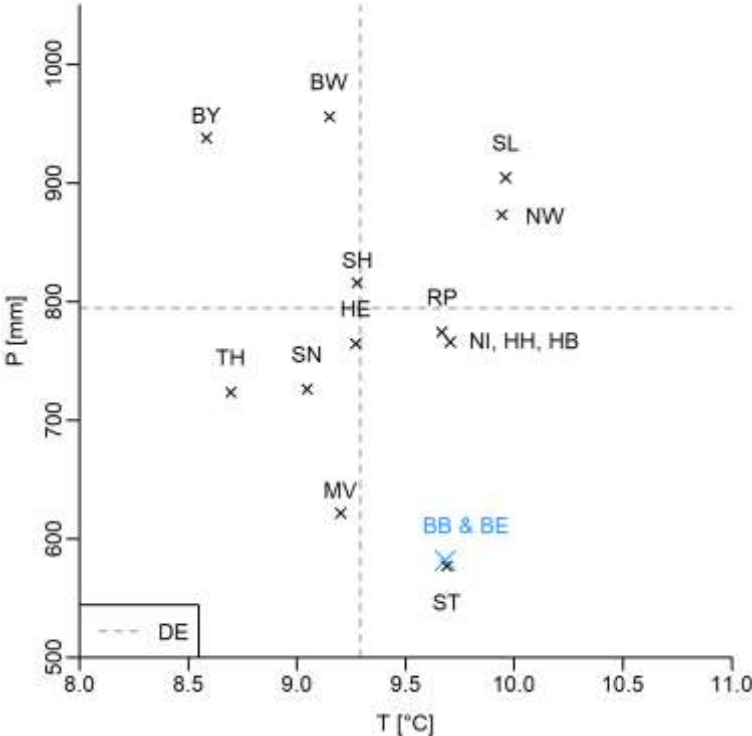

10 S 1 Thermopluviogram for German Federal States and groups of Federal states based on annual mean air temperature (T) and total annual precipitation (P) in the period 1991-2020 for Brandenburg and Berlin (BB&BE), Baden-Württemberg (BW), Bavaria (BY); Mecklenburg-Western Pomerania (MV), Hesse (HE), Lower Saxony, Hamburg and Bremen (NI, HH, HB), North Rhine-Westphalia (NW), Rhineland-Palatinate (RP), Saarland (SL), Saxony (SN), Saxony-Anhalt (ST) and Thuringia (TH). Data: DWD: Annual regional averages of air temperature and precipitation (monthly mean), 2024)

15

20 S 2 Overview of the data and monitoring stations shown. Abbreviations: P precipitation, T air temperature, ETP potential evapotranspiration, Vol storage volume, W water level, Q streamflow, BF soil moisture, Qin inflow, Qent withdrawal, C concentration, %Sew proportion of wastewater, DWD German Weather Service, LTV Saxon Dam Authority, LMBV Lausitzer und Mitteldeutsche Bergbau-Verwaltungsgesellschaft mbH, LfU Landesamt für Umwelt Brandenburg, WSA Federal Waterways and Shipping Administrations, SenMVKU Senatsverwaltung für Mobilität, Verkehr, Klimaschutz und Umwelt, BWB Berliner Wasserbetriebe.

| Station                                                                                                                                       | Variable  | Data Source       | Resolution | Period    |
|-----------------------------------------------------------------------------------------------------------------------------------------------|-----------|-------------------|------------|-----------|
| Dahlem                                                                                                                                        | P, T, ETP | DWD               | 1 d        | 1951-2023 |
| Dahlem                                                                                                                                        | BF        | DWD               | 1 d        | 1991-2023 |
| Spree catchment reservoirs sum of<br>Quitzdorf, Bautzen, Lohsa I, Lohsa II,<br>Bärwalde, Burghammer, Dreiweibern<br>and Spremberg reservoirs) | Vol       | LTV,<br>LMBV, LfU | 1 d        | 2018-2023 |
| Waren, Müritz (Mecklenburger<br>Oberseen)                                                                                                     | W         | WSA               | 1 d        | 1991-2023 |
| Große Tränke UP (Spree)                                                                                                                       | Q         | WSA               | 1 d        | 1991-2023 |
| Wernsdorf OP (Oder-Spree Canal)                                                                                                               | Q         | WSA               | 1 d        | 1991-2023 |
| Neue Mühle UP (Dahme)                                                                                                                         | Q         | WSA               | 1 d        | 1991-2023 |
| Borgsdorf (Obere Havel)                                                                                                                       | Q         | WSA               | 1 d        | 1991-2023 |
| Nauen Plateau / Grunewald area:<br>13 groundwater monitoring wells                                                                            | W         | SenMVKU           | 1 d*       | 2001-2023 |
| Eastern Teltow Plateau:<br>13 groundwater monitoring wells                                                                                    | W         | SenMVKU           | 1 d*       | 2001-2023 |
| Warsaw-Berlin Glacial Spillway:<br>19 groundwater monitoring wells                                                                            | W         | SenMVKU           | 1 d*       | 2001-2023 |
| Barnim Plateau:<br>17 groundwater monitoring wells                                                                                            |           | SenMVKU           | 1 d*       | 2001-2023 |
| Groß Glienicker See                                                                                                                           | W         | SenMVKU           | 1 d        | 1991-2023 |
| Lübars (Tegeler Fließ)                                                                                                                        | W         | SenMVKU           | 1 d        | 2008-2023 |
| Röntgental (Panke)                                                                                                                            | W         | SenMVKU           | 1 d        | 1986-2023 |
| Eisenacher Straße (Wuhle)                                                                                                                     | W         | SenMVKU           | 1 d        | 2008-2023 |
| Wuhletal (Wuhle)                                                                                                                              | W         | SenMVKU           | 1 d        | 2003-2023 |

|                                                                   |                                |              |        |           |
|-------------------------------------------------------------------|--------------------------------|--------------|--------|-----------|
| Honsfelder Brücke (Wuhle)                                         | W                              | SenMVKU      | 1 d    | 2021-2023 |
| Krummendammbrücke (Neuenhagener Mühlenfließ)                      | W                              | SenMVKU      | 1 d    | 1983-2023 |
| Fichtenau (Fredersdorfer Mühlenfließ)                             | W                              | SenMVKU      | 1 d    | 1991-2023 |
| Hegemeisterweg (Fredersdorfer Mühlenfließ)                        | W                              | SenMVKU      | 1 d    | 1981-2023 |
| Spandau OP                                                        | W                              | WSA          | 1 d    | 1991-2023 |
| Total inflow to Berlin*                                           | Q                              | SenMVKU      |        | 2003-2022 |
| Total outflow from Berlin (sum of Tiefwerder and Kleinmachnow UP) | Q                              | SenMVKU, WSA |        | 2003-2022 |
| 5 sewage water treatment plants                                   | Sewage discharge               | BWB          | 1 d    | 2003-2022 |
| 23 sites                                                          | Trace substance concentrations | SenMVKU, BWB | 3 days | 2019      |

---

\* prior to 2004: partly daily instant readings

### S 3 Hydrological main values used in this study

| <b>Abbreviation</b> | <b>Description</b>                                                                                                                                         |
|---------------------|------------------------------------------------------------------------------------------------------------------------------------------------------------|
| HHW (HHQ)           | Highest water level (discharge) ever recorded (given with date of occurrence)                                                                              |
| HW (HQ)             | Highest water level (discharge) in a specified time period                                                                                                 |
| MHW (MHQ)           | Mean high water level (discharge), i.e. mean of the highest water level (discharge) values of the individual years in a specified time period              |
| MW                  | Mean water level (discharge), i.e. mean of daily average water level (discharge) values of the individual years within a specified time period             |
| MLW                 | Mean low water level (discharge), i.e. mean of minimum average daily water level (discharge) values of the individual years within a specified time period |
| LW                  | Lowest average daily water level (discharge) in a specified time period                                                                                    |

25

**S 4 BIBER model description**

The model BIBER (Berechnungs- und Informationssystem Berliner Oberflächengewässer, computation and information system of Berlin's surface waters, IWU, 2019) is a 1D hydronumerical model to simulate the flow conditions in Berlin's hydrological system. BIBER is based on the 1D hydrodynamic model HYDRAX developed to simulate transient flow processes in river networks (Oppermann et al., 2015). HYDRAX is used to numerically solve the Saint Venant equations using the implicate finite difference scheme according to Preismann. Weirs and polders can be included in the model. Both steady-state and transient model runs are possible.

River cross sections are required as model parameters for the Saint Venant equations and the Bernoulli equation. To that end, horizontal and vertical coordinates as well as roughness values describe each cross-section. To account for variations in flow velocities perpendicular to the primary flow direction, five distinct flow zones can be identified: the main channel, left and right forelands, and left and right retention zones. As cross-sections can be structured, e.g. divided by an island, these zone types can occur several times per cross section. For each cross-section, ten flow zones with distinct roughness and distance to the next cross section (to account for meandering) can be considered. The model domain is discretised into river reaches, i.e. unbranched watercourse sections. The state variables of the model (water level, streamflow, flow velocity, cross sectional area and volume between two cross-sections) are calculated in relation to cross sections along a river reach. The boundary conditions for HYDRAX are inflows into the model domain, abstractions, transfers, precipitation and evaporation losses onto the river system as well as water levels. For a detailed model description of HYDRAX including equations please refer to Oppermann et al. (2015, in German).

BIBER, i.e. the HYDRAX model set up for Berlin, considers observed inflows of about 16 tributaries to Berlin including Große Tränke UP, Wernsdorf OP, Neue Mühle UP and Borgsdorf, which are explicitly mentioned, in the main text. The outflow from Berlin and the observed streamflow at selected cross-sections is also considered as input time series. Further, water levels in the impoundments are represented by a time series of one representative gauging station each. Four sewage treatment plants, which release their effluent into the main river network rather than into tributaries, as well as 14 abstractions for water supply and cooling water abstractions and discharges of 2 thermal power plants are considered. Three weather stations are used to derive rainwater discharges into the main river network as well as evaporation losses. Due to the availability of data from water users, BIBER simulations have been performed for the years 2003-2022 on a daily time step. Due to measurement errors of the time series included as well as influences in the main river network not explicitly captured by input time series, the water balance in the BIBER model domain is not always in equilibrium. To address this issue, an automatic error compensation is carried out in BIBER. To that end, the observed time series at Sophienwerder (final gauging station of the Spree upstream of its confluence with the Havel) and at Tiefwerder (first gauging station of the Havel downstream of the

mouth of the Spree) are considered as optimisation target for error correction. All other time series are corrected in a specified range in order to meet the balance at these gauging stations. Especially during summer months, this may not be possible due to large measurement errors. In these cases, a manual quality control and adjustment of observed time series, including those at Sophienwerder and Tiefwerder, may be necessary. BIBER model results are balance corrected time series of the input variables as well as water level, streamflow, flow velocity, cross sectional area and volume between two cross-sections for 1400 cross-sections in Berlin's major river network. A detailed description of BIBER can be found in IWU (2019, in German).

### References S3

IWU: Kurzdokumentation BIBER (Berechnungs- und Informationssystem Berliner Oberflächengewässer) Modellstand 2019 mit instationärem Bilanzausgleich und instationäre Berechnung der Jahresreihe 2003 bis 2018 (01.11.2002 bis 31.10.2018) Modellstand 2019, Berlin, 1–24 pp., 2019.

Oppermann, R., Schumacher, F., and Kirchesch, V.: Hydrax: ein hydrodynamisches 1-D Modell. Mathematisches Modell und Datenschnittstellen, BfG-1872, 1–54 pp., 2015.

70

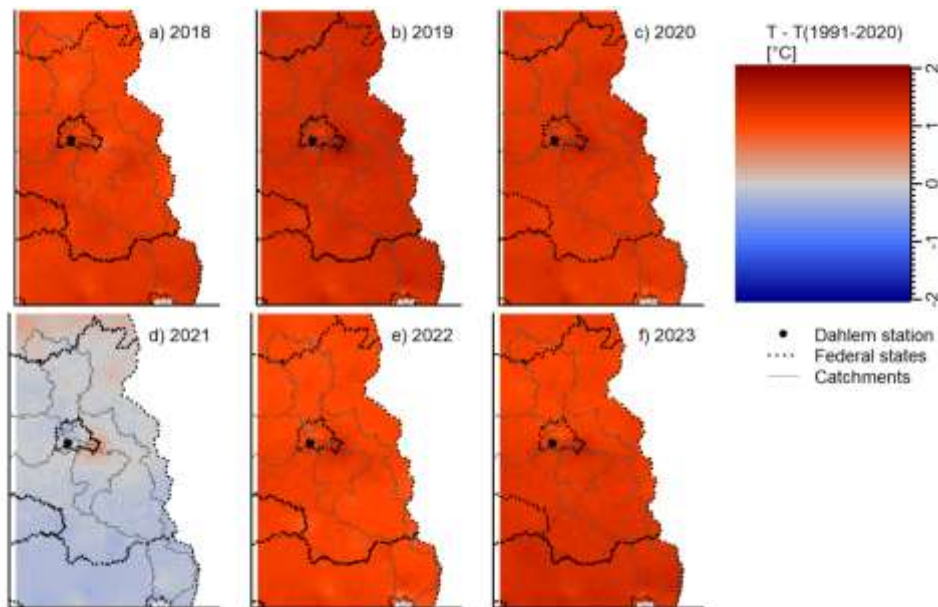

75 **S 5** Difference in annual air temperature compared to long-term mean annual air temperature (1991-2020): a) 2018, b) 2019, c) 2020, d) 2021, e) 2022, f) 2023. The map also shows the federal states (dark lines) and the catchments (grey lines) as well as the Dahlem weather station (point). Data: DWD Climate Data Center (CDC): Annual sum of monthly precipitation grids over Germany, version v1.0, Access date: 25<sup>th</sup> July 2024.

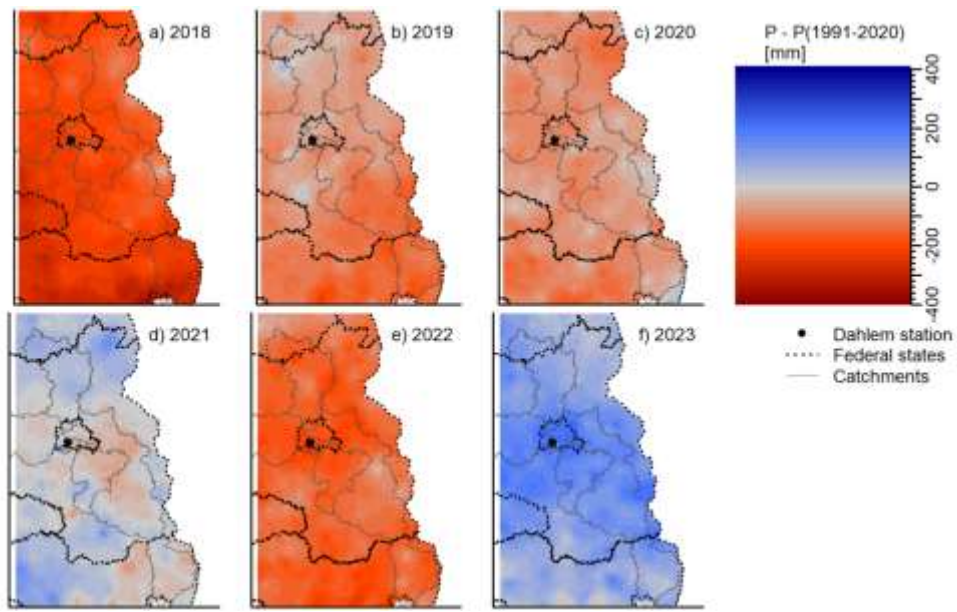

80 S 6 Difference in annual precipitation compared to long-term means of annual precipitation (1991-2020): a) 2018, b) 2019, c) 2020, d) 2021, e) 2022, f) 2023. The map also shows the federal states (dark lines) and the catchments (grey lines) as well as the Dahlem weather station (point). Data: DWD Climate Data Center (CDC): Annual grids of monthly averaged daily air temperature (2m) over Germany, version v1.0. Access date: 25<sup>th</sup> July 2024.

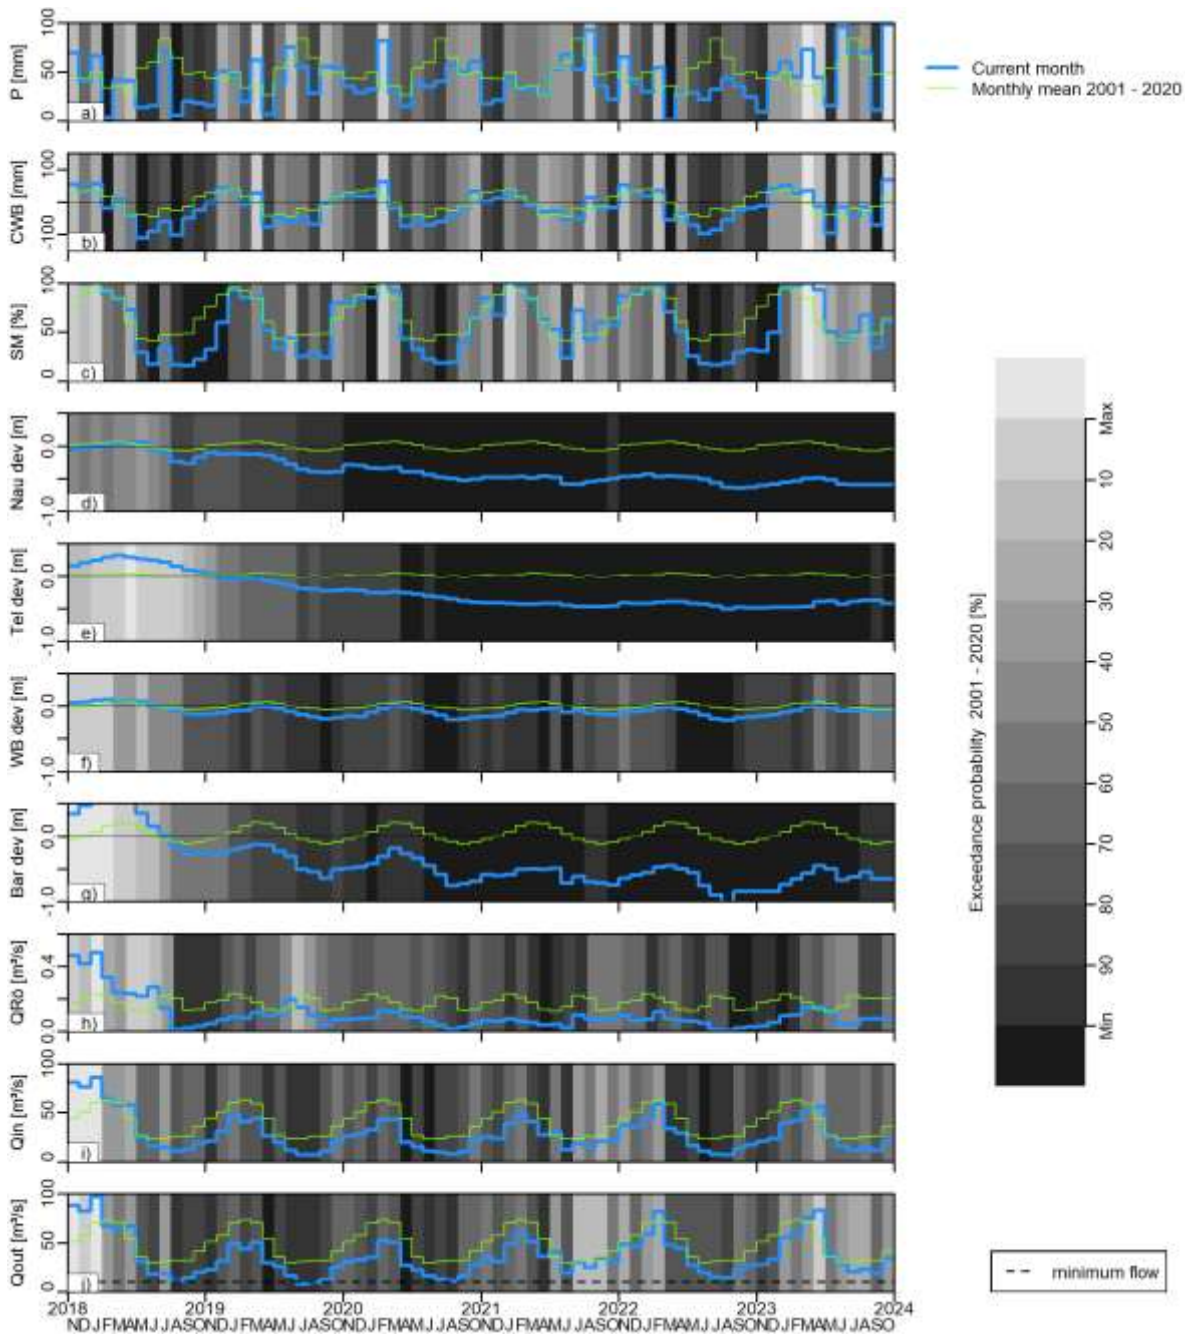

**S 7 Summary of Drought propagation through Berlin's hydrological cycle as percentiles for months and long-term monthly mean values for the hydrological years 1991-2020 and monthly values in the hydrological years 2018-2023: a) precipitation sum (P), b) sum of the climatic water balance (CWB), c) mean soil moisture (SM), d-g) median deviation from the long-term median groundwater levels of the Nauen Plateau / Grunewald area (Nau dev) (d), Eastern Teltow Plateau (Tel dev) (e), Warsaw-Berlin Glacial valley (WB dev) (f) and Barnim Plateau (Bar dev) (g), please note for these we used 2001-2020 as reference period, h) streamflow of the Panke at Röntgental (QRö), i) inflow to Berlin (Qin) from the tributaries Spree (Große Tränke UP), Dahme (Neue Mühle UP), Oder Spree Canal (Wernsdorf OP) and Obere Havel (Borgsdorf), j) total outflow as sum of Havel (Tiefwerder) and Teltow Canal (Kleinmachnow OP; Qout). Data:**
